1 **Perceived disrespect and abuse among women delivering at**  
2 **a tertiary care center in Nepal**

3 Sabika Munikar<sup>1¶\*</sup>, Mala Chalise<sup>2¶</sup>, Ranjan Dhungana<sup>3¶</sup>, Durga Laxmi Shrestha<sup>4</sup>, Naresh Pratap  
4 KC<sup>3</sup>, Animesh Dhungana<sup>3</sup>, Robert B. Clark<sup>5</sup>, Michael K. Visick<sup>6</sup>, Kanchan Thapa<sup>3,7¶</sup>

5 <sup>1</sup> Post Basic Bachelor of Nursing Science Faculty, Om Health Campus, Kathmandu, Nepal

6 <sup>2</sup> Independent Researcher from Kathmandu, Nepal.

7 <sup>3</sup> Helping Babies Breathe (HBB) Program, Safa Sunaulo Nepal, Kathmandu, Nepal

8 <sup>4</sup> Ministry of Health and Population, Nepal

9 <sup>5</sup> Department of Public Health, Brigham Young University, Provo, Utah, USA.

10 <sup>6</sup> Department of Pediatrics, University of Utah School of Medicine, Utah, USA.

11 <sup>7</sup> Central Department of Population Studies, Tribhuvan University, Kathmandu, Nepal.

12

13 **\*Correspondence:** [mesabika@gmail.com](mailto:mesabika@gmail.com) (SM)

14 <sup>¶</sup>These authors contributed equally to this work.

15

16

17

18

19

20

## 21 **Abstract**

### 22 **Background**

23 Of the children born every year in Nepal, 57.4% are delivered in health facilities. Disrespect and  
24 abuse of women during maternity care are problems that can significantly impact women's  
25 willingness to seek out life-saving maternity care. However, evidence suggests ongoing  
26 disrespectful maternity care worldwide. This study aims to identify perceived disrespect and  
27 abuse during labor and delivery among postnatal women delivering at Bheri Hospital, Nepal.

### 28 **Methods**

29 A cross sectional study was conducted among 445 purposively selected women admitted in  
30 postnatal ward of Bheri Hospital, Nepal from February to March 2020. Ethical approval was  
31 obtained from Nepal Health Research Council. Informed written consent was obtained from each  
32 participant and a face-to-face interview was conducted for data collection. A semi-structured  
33 questionnaire consisting of demographic information and a pre-validated Respectful Maternity  
34 Care (RMC) tool was used. The information was then checked, coded, and entered in SPSS for  
35 descriptive and inferential analysis.

### 36 **Results**

37 In this study, the participants perceived very high friendly care, abuse-free care and  
38 discrimination-free care but moderate timely care only. Timely care was found to be significantly  
39 associated with age, ethnicity, occupation, monthly income, gravida, type of delivery, and  
40 complications. On multinomial regression, monthly income and type of delivery were the only  
41 factors found to be significant. Those mothers who had spontaneous vaginal delivery were 2.07  
42 times more likely to have neutral RMC, and those who earn less than twenty thousand Nepalese  
43 rupees per month were likely to perceive high timely RMC.

44 **Conclusion**

45 This study concludes that disrespectful or abusive maternal care is not perceived among women  
46 delivering at Bheri Hospital in terms of friendly care, abuse-free care and non- discriminatory  
47 care. However, timely care is less reported. Appropriate interventions to provide timely care to  
48 delivering women must be instituted.

49 **Key words:** Delivery; Disrespect and abuse; Labor; Maternal health services; Respectful  
50 maternity care; Midwives

51

52

53

54

55

56

57

58

59

60

61

## 62 **Introduction**

63 With Maternal Mortality Ratio (MMR) at 239 per 100,000 live births in 2016- higher than its  
64 South Asian neighbors- maternal mortality remains a formidable challenge in Nepal. Although  
65 the country has witnessed considerable decline in MMR by 55% from 1996 to 2016 [1], it still  
66 needs to go a long way to achieve the target of 70 per 100,000 live births as set out in the  
67 Sustainable Development Goals (SDGs) [2].

68 Ensuring access to quality skilled care before, during, and after childbirth is vital in reducing  
69 maternal mortality [3]. In low resource settings such as Nepal the lack of availability of skilled  
70 care services, mistreatment during childbirth, including abusive, neglectful, or disrespectful care  
71 may result in compromised quality [4]. Women have experienced disrespect and abuse (D &A)  
72 all over the world in various forms ranging from physical or verbal abuse, stigma or  
73 discrimination [4], detention of babies [4], being shouted at [5], threatening comments [5],  
74 withholding procedure related information and providing non-consented care [5]. For instance, a  
75 study in Ghana revealed that only a few clients were encouraged to ask questions and explained  
76 what to expect during labor [4]. Non-confidential care has also been reported [6], as identified in  
77 a study conducted in India. Similarly, evidences suggest that women have also experienced poor  
78 quality care in the form of restriction in their choice of birth position and movement, and  
79 restriction of liquid drinks during delivery [7].

80 Although a growing body of evidence paints a disturbing picture of women's experience of care  
81 during pregnancy and child birth, health care providers justify such acts on the grounds of  
82 punishment for non-cooperation from women and good outcomes to babies[4]. Analyzed from  
83 the perspective of health service delivery system, difficult circumstances in health facilities  
84 under which maternity staffs work, system failures, and inadequate human resource management

85 have been found as important reasons for D&A during delivery [8]. However, justifying  
86 disrespectful care and abuse based on these factors is a violation of women’s human rights.  
87 RMC has been defined by World Health Organization (WHO) as “care organized for and  
88 provided to all women in a manner that maintains their dignity, privacy, and confidentiality,  
89 ensures freedom from harm and mistreatment, and enables informed choice, and continuous  
90 support during labor and childbirth” [9]. In this sense, RMC focuses on expanding safe  
91 motherhood beyond prevention of maternal mortality and morbidity to incorporate a human-  
92 rights based approach, including respect to women’s autonomy, dignity, choices, privacy and  
93 preferences [10]. RMC recognizes that all women need and deserve respectful care; and focuses  
94 on eliminating D&A during pregnancy and childbirth.

95 Despite the existing evidences that suggest D&A during childbirth presents considerable  
96 impediments to utilization of skilled birth care globally [9], only a few studies have been  
97 undertaken to understand the phenomena in Nepal. The majority of these studies have used a  
98 qualitative approach and only a limited number of studies have used a validated quantitative tool  
99 to measure the level of D&A at the point of service provision, out of which the greater number  
100 are based on health facilities in Kathmandu Valley.

101 This study aimed to identify perceived D&A during labor and deliveries among postnatal women  
102 admitted at a remote hospital and also determine the factors affecting RMC. Understanding  
103 women’s perspective of D&A during care is essential to identify factors that generate RMC in  
104 the health facility and subsequently in the provision of RMC as envisioned in The Right to Safe  
105 Motherhood and Reproductive Health Act of 2018.

## 106 **Methods**

### 107 **Study Design, Study Setting and Sample Size**

108 A cross-sectional study was done to identify the forms and associated risk factors of perceived  
109 disrespect and abuse among women delivering at Bheri Hospital, Nepal. With 5083 deliveries  
110 conducted in the year 2017-18 [11], Bheri Hospital in southwestern Nepal is a major referral  
111 center for emergency obstetric care services for three out of seven provinces (Lumbini Province,  
112 Karnali Province & Sudur Pachhim Province) of the country.

113 The sample size was calculated based on a study conducted in India, Ghana, and Kenya which  
114 depicted an overall prevalence of verbal abuse to be 16% across all countries [6]. Considering  
115 the prevalence of verbal abuse to be 16%, and level of significance to be 95%, the minimum  
116 sample size for the proposed study was calculated to be 237. However, we were able to collect  
117 the information from 445 women who delivered during the allocated period of data collection.

### 118 **Study Participants and Recruitment**

119 Purposive sampling technique was used to interview postnatal women admitted at the postnatal  
120 ward of Bheri Hospital, within 24 hours of delivery. Those who were unwilling to participate in  
121 the study, couldn't understand and/or speak the Nepali language or had a stillbirth or macerated  
122 birth during delivery were excluded from the study.

### 123 **Data Collection**

124 Face-to-face interview technique was used to collect data. Each interview lasted for  
125 approximately 20 minutes and conducted in the Nepali language. The data were collected from  
126 February to March 2020. Informed written consent was obtained before data collection. Data  
127 were collected from women in postnatal ward within 24 hours of delivery to avoid recall bias.

128 A semi-structured questionnaire, divided into two parts, was used as the tool for data collection.  
129 The first part included questions relating to socio-demographic factors and obstetric history,  
130 details of which are presented in Table 1. The second part of the questionnaire was based on a  
131 validated RMC tool with 15 items used to measure women's perception regarding RMC. The  
132 tool has four dimensions: friendly care, abuse-free care, timely care and non-discriminatory care  
133 consisting of 7, 3, 3 and 2 items, respectively [12]. The construct validity of the scale is  
134 confirmed by the high average factor loading of the four components ranging from 0.76 to 0.82  
135 and a low correlation between the components. The scale has adequate reliability with  $\alpha =$   
136 0.845[13]. The instrument was translated into the Nepali language and validated by a Nepali  
137 language expert. The content validity of the instrument was established by consultation with  
138 subject experts. Consistency of the tool was checked by pre-testing among 10% of women  
139 delivering at Bheri Hospital which was not included in the final study sample.

## 140 **Data Analysis**

141 The collected data was checked, organized and coded, and entered into Microsoft excel and then  
142 exported to SPSS (Statistical Package for the Social Sciences) 17.0 version for analysis. The data  
143 were analyzed by using descriptive statistics like frequency, percentage, mean, standard  
144 deviation, and inferential statistics: chi-square test, and multinomial logistic regression.

145 Mean score (M) of four broad components i.e. friendly care, timely care, abuse free care, and  
146 non- discriminatory care was used to describe the level of respectful maternity care experienced  
147 by the postpartum women during childbirth in each component separately. To determine the  
148 participant's degree of respectful maternity care, the following Likert- range conversion and  
149 qualitative interpretation were used: 4.20- 5.00-Very High, 3.4- 4.19 -High, 2.60- 3.3 - Moderate,  
150 1.80- 2.5 -Low and 1- 1.78 Very Low [12].

## 151 **Ethical Approval**

152 Ethical approval was obtained from the Nepal Health Research Council (Ref #1953, 18 March  
153 2020). Written permission from Bheri Hospital administration was also obtained. Informed  
154 written consent was obtained from the respondents. Participants were also assured that their  
155 participation/non-participation would have no bearing on their treatment. Confidentiality of the  
156 participants was maintained by assigning unique identification code to each participant.

## 157 **Results**

158 Table 2 depicts the socio-demographic information of the participants. The majority of them  
159 (74.4%) were aged 20- 30 years, belonged to the Janjati ethnic group (46.1%), and most of them  
160 (91.2%) followed the Hindu religion. The majority (86.7%) were educated. However, almost half  
161 (50.8%) were unemployed. Approximately fifty-three percent of respondents were from joint or  
162 extended family. Regarding the spouse's background, most of them (91.7%) were educated and  
163 were involved in a non-formal occupation (71.5%).

164 Table 3 illustrates the obstetric history of participants. The majority of participants had less than  
165 two gravidae (75.7%), were multiparous (64.7%) and most of them (95.7%) had term pregnancy.  
166 Almost half of the participants (51.5%) delivered via spontaneous vaginal delivery (SVD) while  
167 remaining delivered via augmented labor and/or lower section cesarean section. One third of  
168 respondents (33.3%) had complications during labor.

169 Table 4 shows the perception of participants regarding RMC on a 5 points Likert scale. The  
170 components of RMC are presented in four broad categories of Friendly Care, Abuse-free Care,  
171 Timely Care, and Non-discriminatory Care.

172 Regarding Friendly Care, very few respondents disagreed that the health workers cared for them  
173 with kind approach (0.9%), treated them in a friendly manner (2.6%), talked positively about the



174 pain and relief measures (2.0%), showed concern and empathy (0.2%), treated them with respect  
175 as an individual (1.5%), and spoke in understandable language (10.5%). Of note, almost half of  
176 the participants (47.2%) disagreed on being called by their name.

177 The table also presents the perception of participants towards Abuse-free Care. Nearly 32.6%  
178 disagreed with the statement that health workers responded to their needs whether or not asked.  
179 Also, 5.6% reported being slapped during delivery for different reasons, and a similar number of  
180 participants (4.7%) reported being shouted at for not doing what they were told to do.

181 Regarding Timely Care, more than a quarter of participants (27.8%) agreed to being kept waiting  
182 for a long time before receiving care, but a higher number of participants were not allowed to  
183 practice cultural rituals (62%). Some agreed that service was delayed due to health facility's  
184 internal problems (18.7%).

185 Perception towards Discrimination-free Care shows that few respondents (3.3%) agreed that the  
186 health workers did not treat them well because of personal attributes. Also, 2.9% of participants  
187 agreed that some health workers insulted them and their companions due to personal attributes.

188 The mean score shows that the participants' perceptions of Non-discrimination Care (4.67),  
189 Friendly Care (4.42) and Abuse-free Care (4.29) were very high, whereas perception of Timely  
190 Care (3.10) was comparatively moderate.

191 Table 4 presents the findings of the association between selected demographic and obstetric  
192 characteristics and the Friendly Care component of RMC. This table shows that there is a  
193 significant association between timely care and monthly income ( $p<0.05$ ), gravida ( $p<0.05$ ), para  
194 ( $p=0.004$ ), and week of gestation ( $p=0.026$ ).

195 Table 6 reveals the association between Abuse-free Care and selected demographic and obstetric  
196 characteristics. This table shows that there is a significant association between Abuse-free Care  
197 and spouse's occupation ( $p=0.002$ ), para ( $p=0.010$ ), type of delivery ( $p<0.05$ ).

198 Table 7 shows the association between Timely Care and selected characteristics which reveals  
199 that there is a significant association between Timely Care and age ( $P<0.05$ ), ethnicity ( $p=0.002$ ),  
200 occupation ( $p=0.001$ ), monthly income ( $p<0.05$ ), gravida ( $p<0.05$ ), type of delivery ( $p=0.002$ ),  
201 and complications ( $p=0.002$ ). However, there is no significant association between Timely Care  
202 and educational status, spouse's occupation, or week of gestation ( $P>0.05$ ).

203 As mentioned in Table 4, among the four components, women's perception of Timely Care was  
204 found to be moderate whereas other dimensions of RMC were perceived very high. To determine  
205 the factors resulting in moderate perception of Timely Care, multinomial logistic regression was  
206 done. Table 8 shows that those who had SVD were 2.07 times as likely to have neutral RMC for  
207 Timely Care. Similarly, those who earn less than twenty thousand Nepalese Rupees per month  
208 were 2.36 (1.30-4.23) times as likely to have high Timely RMC in Nepal. We did not observe  
209 any significant effects between gravida, complication during the delivery, and the number of  
210 living children ( $P>0.05$ ).

## 211 **Discussion**

212 This study aimed to identify perceived Disrespect & Abuse and its associated factors during  
213 labor and delivery among postnatal women at a busy referral hospital in western Nepal. D&A are

214 evaluated based on four different dimensions of RMC i.e. Friendly Care, Abuse-free Care,  
215 Timely Care and Discrimination-free Care. Very high degree of Friendly Care, Abuse-free Care  
216 and Discrimination-free Care was identified, however, only moderate Timely Care was  
217 perceived by the participants which is in contrast to the study in Egypt where only  
218 Discrimination-free Care was perceived to be high and other dimensions to be moderate [12].  
219 The reason for high rating of Abuse-free Care in this study could be normalization of the abuse  
220 in the health care setting [14], where delivering women think that it is normal to be abused  
221 physically and/or verbally for better labor outcomes. Also, despite the knowledge of principles of  
222 RMC among health care providers, this knowledge may not translate to an improvement in  
223 actual respectful care at the bedside [14].

224 Most of the women (91.3%) perceived that they were treated in a friendly manner which is  
225 consistent with a direct observation of RMC in health facilities of five countries in East and  
226 Southern Africa (86%) [7]. Talking positively about the pain and relief measures was one of the  
227 components of Friendly Care where very few respondents (2.0%) disagreed with the statement.  
228 The reasons for not addressing pain may be due to the lack of availability of a doctor [14] and/or  
229 the shortage of health workers persistent in the country [15]. The shortage, however, might have  
230 been more pronounced at the time of data collection due to the ongoing staff adjustment process  
231 undertaken as part of implementing Federalism in the country [16].

232 WHO recommends communication between maternity care providers and women in labor, using  
233 simple and culturally acceptable methods [17]. Evidence suggests that language barrier is a  
234 critical factor that hinders effective communication and can also pose considerable risk to patient  
235 safety and quality of care [18]. More than two third of the participants (84%) in this study  
236 confirmed that the health worker spoke in a language understandable to them. A study conducted

237 in Egypt found that nearly 61% of the health workers did not communicate in an understandable  
238 language. This suggests that language barrier was less common in our context. To ensure  
239 respectful attitude and supportive environment during delivery, it is required to continue  
240 emphasizing the importance of health care provider-client communication and client-centered  
241 care [19].

242 One of the critical elements affecting patients' perception of RMC is the way in which a patient  
243 is addressed by a name of her/his preference. Patients' preferred mode of address by healthcare  
244 workers, to large extent, is influenced by ethnic and cultural factors. For instance, a study on  
245 non-English speaking Australians shows that patients preferred to be called by their informal  
246 name [20]. On the other hand, patients in countries like Iran [21] and Israel [22] preferred formal  
247 address by title and surname. In this study, 47.2% respondents agreed that they were called by  
248 their preferred name, which is similar to the study from Egypt [12]. However, with limited  
249 evidence on Nepalese patients' preference of address by healthcare workers, the present study is  
250 unable to provide contextual interpretation of the figure. Therefore, we recommend further study  
251 on Nepalese patients' preferred mode of address by healthcare workers.

252 Neglect or abandonment during labor and delivery has been reported in varying degrees in  
253 countries like Kenya (14.3%) [23] and Tanzania (3.45%)[24]. This neglect could be in form of  
254 health workers not being present at the time of birth, not providing medications or not  
255 communicating the progress of labor. More than a quarter of women in this study responded that  
256 the health workers did not respond to their need whether or not asked, which is quite a large  
257 figure compared to those reported previously. The reason for not responding to needs could be  
258 the heavy workload of midwives and health care workers[25]. In an overburdened Nepali health  
259 care system where patient to healthcare workers ratio is unimaginably high [26]. In a

260 communication with Shanti Kandel, RN (January 2021), six thousand delivery in Bheri Hospital  
261 is attended by a group of only eleven staffs for the fiscal year 2076/77. Silence can be a way in  
262 which a system defends itself against the many needs of patients. Silence from a care provider  
263 can cause neglect, resulting to avoidable complications during delivery [25], negative impact on  
264 the health of mother and / or baby [27] and also unwillingness to return or recommend others to  
265 the health facility for next delivery [28]. Respondents with complications are generally more  
266 likely to report D & A during delivery[29]. Although a third of respondents in this study had  
267 complications, rates of D & A remained low.

268 Women, during the process of delivery, are vulnerable to being abused by health workers  
269 whether it might be physical or verbal [28,30,31]. Such abuses are likely to result in a high rate  
270 of traumatic birth experience for women [32]. Different forms of abuse like being slapped (5.6%)  
271 or being shouted at (4.6%) has been reported in this study. Women experiencing physical and  
272 verbal abuse was found to be dramatically higher in another study conducted in central Nepal,  
273 which reported physical and verbal abuse to be 18.7% and 30% respectively [33]. The difference  
274 in reported abuse thus requires extensive research to identify the prevalence and institute  
275 appropriate interventions. A study has demonstrated that midwives feel a strong sense of  
276 accountability and responsibility for labor and delivery outcomes and tend to do whatever it  
277 takes to deliver a live baby to a healthy mother [34]. In addition, the midwives/ nurses ratio per  
278 population for Nepal is lesser (31.08/10,000 population) than the recommended by WHO  
279 (40/10,000 population) leading to overburden for health workers [35]. WHO recognizes that D  
280 & A not only violate the rights of women to respectful care, but also threaten their rights to life,  
281 health, bodily integrity and freedom from discrimination [36]. However, abuse in any form,  
282 whether it be physical or verbal should never be tolerated during labor and delivery.

283 Nearly half of the respondents (48.3 %) agreed that they were kept waiting for a long time,  
284 which is substantially higher than the study conducted in Ghana, Guinea, Myanmar, and Nigeria  
285 where 22% reported waiting for long periods before being attended by health workers [4]. The  
286 delay in care (27.8%) might be due to too few staff as compared to patients as revealed by a  
287 study of midwives of Malawi [8]. The situation might be similar in Nepal as shortage of staffs in  
288 the hospital setting has been reported [37], further worsened by the ongoing shifts in staff  
289 allocation as a part of Federalism.

290 Few participants i.e. approximately three out of a hundred, agreed that the health workers did not  
291 treat them well because of personal or their companions' attributes, which is in contrast to a  
292 study conducted in Nigeria that showed a higher percentage of discrimination faced by  
293 respondents at 8.1% [38]. Birth preparedness practice in Nepal tends to be higher as reported by  
294 a study that denotes familiarization of pregnant women with the delivery setting. Early  
295 communication and interpersonal relationship between care provider and patient could be a cause  
296 for higher Discrimination-free Care [39].

297 Women with SVD were two times more likely to have a neutral response about RMC for Timely  
298 Care as compared to those who had cesarean delivery. Women experiencing caesarian delivery  
299 could have ultimately perceived the urgency of services for delivering a healthy baby, thus  
300 women with SVD would be more likely to report neutral Timely Care. Similarly, those who earn  
301 less than twenty thousand Nepalese Rupees were twice as likely to feel they had a high level of  
302 timely RMC. Women of lower economic status may be more tolerant of a long wait in order to  
303 receive care in a government facility with higher case load as opposed to delivering at home.

## 304 **Limitations**

305 This study has used a standardized tool to gather quantitative information about D & A faced by  
306 women during labor and delivery. However in-depth insight regarding health workers'  
307 perceptions and/or those of delivering women could not be obtained. Also, the potential for  
308 generalization of the findings cannot be ascertained as only a single tertiary care center in  
309 western Nepal has been included for the study.  
310 Information bias and courtesy bias might have occurred as the information was collected by an  
311 on- duty student nurse, although the respondents were assured prior to the study that their  
312 opinion would have no impact on further treatment.

## 313 **Recommendations**

314 Any forms of D & A must be prohibited during labor and delivery so that women can enjoy their  
315 experience of labor and delivery. Irrespective of the health system or staff-related issues; timely  
316 care must be of priority in order to ensure quality maternity care. Timely Care is simply not  
317 always possible in highly constrained settings such as Bheri Hospital, but the perception of  
318 Timely Care might possibly be reduced by additional communication and explanations of the  
319 cause of the delay.  
320 Further studies should be conducted to determine RMC at all levels of the healthcare system  
321 throughout the country, such that potential generalization of our findings and appropriate  
322 interventions for improvement can be planned accordingly.  
323 Sustained interaction with the health system are required to implement behavior change  
324 intervention central to promoting respectful care [40]. The successful improvement in maternity  
325 care environment for women and midwives needs broader interdisciplinary perspectives on the  
326 wider drivers of midwives' disrespectful attitudes and behaviors [8].

## 327 **Conclusion**

328 This study concludes that RMC is practiced highly in western Nepal in terms of Friendly Care,  
329 Abuse-free Care, and Discrimination-free Care. However, Timely Care is less reported.  
330 Therefore, appropriate interventions to provide Timely Care to delivering women must be  
331 instituted. Along with this, adequate communication and explanation of delay can reduce  
332 perception of delayed care among care recipients. Physical or verbal abuse during labor and  
333 delivery must not be tolerated, and while rates of abuse were shown to be low in this study, there  
334 remains room for improvement. Further research on RMC in Nepal is required to clarify the  
335 drivers for D & A and examine potential solutions.

## 336 **Abbreviations**

337 D&A- Disrespect & Abuse

338 LSCS – Lower Segment Caesarian Section

339 MMR - Maternal Mortality Ratio

340 NHRC- Nepal Health Research Council

341 RMC- Respectful Maternity Care

342 SDG – Sustainable Development Goals

343 SVD – Spontaneous Vaginal Delivery

344 WHO- World Health Organization

## 345 **Declaration**



346 **Competing interests:** The authors declare no competing interests.

347 **Funding:** The study was self-funded by the authors.

348 **Acknowledgments:** The authors are immensely thankful to the management of Bheri  
349 Hospital and to the NHRC for ethical approval. We express sincere gratitude to all women who  
350 participated in this study along with delivery room residents and midwives for providing support  
351 during the study. At last but not the least, we are thankful to all the student nurses of Sushma  
352 Koirala Memorial Hospital, Nepalgunj, Banke for their support during data collection.

## 353 **References**

- 354 [1] Aryal KK, Sharma SK, Khanal MN, et al. Maternal health care in Nepal: Trends and  
355 determinants [Internet]. 2019. Available from:  
356 <https://dhsprogram.com/pubs/pdf/FA118/FA118.pdf>.
- 357 [2] NHRC. Accelerating the safe motherhood program to avert preventable maternal deaths in  
358 Nepal [Internet]. Kathmandu; 2016. Available from: [http://nhrc.gov.np/wp-](http://nhrc.gov.np/wp-content/uploads/2019/07/Policy-Brief-on-Maternal-Mortality-in-Nepal.pdf)  
359 [content/uploads/2019/07/Policy-Brief-on-Maternal-Mortality-in-Nepal.pdf](http://nhrc.gov.np/wp-content/uploads/2019/07/Policy-Brief-on-Maternal-Mortality-in-Nepal.pdf).
- 360 [3] Leontine Alkema, Chou D, Hogan D, et al. National, regional, and global levels and trends  
361 in maternal mortality between 1990 and 2015 with scenario-based projections to 2030: a  
362 systematic analysis by the United Nations Maternal Mortality Estimation Inter-Agency  
363 Group. *Lancet* [Internet]. 2016;387:462–474. Available from:  
364 <https://www.ncbi.nlm.nih.gov/pmc/articles/PMC5515236/pdf/nihms863926.pdf>.

- 365 [4] Bohren MA, Mehrtash H, Fawole B, et al. How women are treated during facility-based  
366 childbirth in four countries□: a cross-sectional study with labour observations and  
367 community-based surveys. *Lancet* [Internet]. 2019;394:1750–1763. Available from:  
368 [https://www.thelancet.com/journals/lancet/article/PIIS0140-6736\(19\)31992-0/fulltext](https://www.thelancet.com/journals/lancet/article/PIIS0140-6736(19)31992-0/fulltext).
- 369 [5] Kruk ME, Kujawski S, Mbaruku G, et al. Disrespectful and abusive treatment during  
370 facility delivery in Tanzania□: a facility and community survey. *Health Policy Plan*  
371 [Internet]. 2018;33:e26–e33. Available from:  
372 <https://academic.oup.com/heapol/article/33/1/e26/2907853>.
- 373 [6] Afulani PA, Phillips B, Aborigo RA, et al. Person-centred maternity care in low-income  
374 and middle-income countries\_ analysis of data from Kenya, Ghana, and India. *Lancet*  
375 *Glob Heal* [Internet]. 2019;7:e96-109. Available from:  
376 <https://www.sciencedirect.com/science/article/pii/S2214109X18304030>.
- 377 [7] Rosen HE, Lynam PF, Carr C, et al. Direct observation of respectful maternity care in five  
378 countries□: a cross-sectional study of health facilities in East and Southern Africa. *BMC*  
379 *Pregnancy Childbirth* [Internet]. 2015;15:1–11. Available from:  
380 <https://europepmc.org/article/PMC/4657214>.
- 381 [8] Bradley S, Chipeta E, Kamwendo F, et al. Too few staff , too many patients□: a  
382 qualitative study of the impact on obstetric care providers and on quality of care in  
383 Malawi. *BMC Pregnancy Childbirth* [Internet]. 2015;15:1–10. Available from:  
384 <https://www.ncbi.nlm.nih.gov/pubmed/25880644>.
- 385 [9] WHO Reproductive Health Library. WHO recommendation on respectful maternity care  
386 during labour and childbirth [Internet]. WHO Reprod. Heal. Libr. Geneva World Heal.

- 387 Organ. 2018. p. 1–11. Available from: [https://extranet.who.int/rhl/topics/preconception-](https://extranet.who.int/rhl/topics/preconception-pregnancy-childbirth-and-postpartum-care/care-during-childbirth/who-recommendation-respectful-maternity-care-during-labour-and-childbirth)
- 388 [pregnancy-childbirth-and-postpartum-care/care-during-childbirth/who-recommendation-](https://extranet.who.int/rhl/topics/preconception-pregnancy-childbirth-and-postpartum-care/care-during-childbirth/who-recommendation-respectful-maternity-care-during-labour-and-childbirth)
- 389 [respectful-maternity-care-during-labour-and-childbirth](https://extranet.who.int/rhl/topics/preconception-pregnancy-childbirth-and-postpartum-care/care-during-childbirth/who-recommendation-respectful-maternity-care-during-labour-and-childbirth).
- 390 [10] USAID. Respectful maternity care [Internet]. 2012. Available from:
- 391 [https://toolkits.knowledgesuccess.org/sites/default/files/rmc\\_survey\\_report\\_0\\_0.pdf](https://toolkits.knowledgesuccess.org/sites/default/files/rmc_survey_report_0_0.pdf).
- 392 [11] Thapa K, Parajuli U. Trend of caesarean section in Bheri zonal hospital. J
- 393 NepalgunjMedical Coll Coll [Internet]. 2018;16:41–45. Available from:
- 394 [https://www.nepjol.info/index.php/JNGMC/article/view/24227?fbclid=IwAR1wEsxQkw](https://www.nepjol.info/index.php/JNGMC/article/view/24227?fbclid=IwAR1wEsxQkwOsBNcWF13t1P0Mhyt4CuRu0MeFCLMnn7FKLm2BRpRxxOtz9pI)
- 395 [OsBNcWF13t1P0Mhyt4CuRu0MeFCLMnn7FKLm2BRpRxxOtz9pI](https://www.nepjol.info/index.php/JNGMC/article/view/24227?fbclid=IwAR1wEsxQkwOsBNcWF13t1P0Mhyt4CuRu0MeFCLMnn7FKLm2BRpRxxOtz9pI).
- 396 [12] Mousa O, Turingan OM. Quality of care in the delivery room □: Focusing on respectful
- 397 maternal care practices. J Nurs Educ Pract [Internet]. 2019;9. Available from:
- 398 <http://www.sciedupress.com/journal/index.php/jnep/article/view/13634>.
- 399 [13] Sheferaw ED, Mengesha TZ, Wase SB. Development of a tool to measure women ’ s
- 400 perception of respectful maternity care in public health facilities. BMC Pregnancy
- 401 Childbirth [Internet]. 2016;16:1–8. Available from: [http://dx.doi.org/10.1186/s12884-016-](http://dx.doi.org/10.1186/s12884-016-0848-5)
- 402 [0848-5](http://dx.doi.org/10.1186/s12884-016-0848-5).
- 403 [14] Lambert J, Etsane E, Bergh A. ‘ I thought they were going to handle me like a queen but
- 404 they didn ’ t ’: A qualitative study exploring the quality of care provided to women at the
- 405 time of birth ’. Midwifery [Internet]. 2018;62:256–263. Available from:
- 406 <https://doi.org/10.1016/j.midw.2018.04.007>.
- 407 [15] Baral B, Prajapati R, Karki KB. Distribution and skill mix of health workforce in Nepal. J
- 408 Nepal Heal Res Counc [Internet]. 2013;11:126–132. Available from:

- 409 <https://pubmed.ncbi.nlm.nih.gov/24362599/>.
- 410 [16] Poudel A. Staff adjustment affects health services across the country. Kathmandu Post  
411 [Internet]. 2019 Dec 3; Available from:  
412 [https://kathmandupost.com/health/2019/12/03/staff-adjustment-affects-health-services-](https://kathmandupost.com/health/2019/12/03/staff-adjustment-affects-health-services-across-the-country)  
413 [across-the-country](https://kathmandupost.com/health/2019/12/03/staff-adjustment-affects-health-services-across-the-country).
- 414 [17] WHO. WHO recommendation on effective communication between maternity care  
415 providers and women in labour. Reprod. Heal. Libr. Geneva; 2018.
- 416 [18] Moissac D De, Bowen S. Impact of language barriers on quality of care and patient safety  
417 for official language minority francophones in Canada. J Patient Exp [Internet].  
418 2019;6:24–32. Available from:  
419 <https://journals.sagepub.com/doi/full/10.1177/2374373518769008>.
- 420 [19] Solomon S, Mark S, Merijn G, et al. Why do women prefer home births in Ethiopia?  
421 BMC Pregnancy Childbirth [Internet]. 2013;13. Available from:  
422 [http://ovidsp.ovid.com/ovidweb.cgi?T=JS&PAGE=reference&D=medl&NEWS=N&AN=](http://ovidsp.ovid.com/ovidweb.cgi?T=JS&PAGE=reference&D=medl&NEWS=N&AN=23324550)  
423 [23324550](http://ovidsp.ovid.com/ovidweb.cgi?T=JS&PAGE=reference&D=medl&NEWS=N&AN=23324550).
- 424 [20] Parsons SR, Hughes AJ, Friedman ND. “Please don’t call me Mister”: Patient preferences  
425 of how they are addressed and their knowledge of their treating medical team in an  
426 Australian hospital. BMJ Open [Internet]. 2016;6:1–4. Available from:  
427 <https://pubmed.ncbi.nlm.nih.gov/26739720/>.
- 428 [21] Najafi M, Khoshdel A, Kheiri S. Preferences of Iranian patients about style of labelling  
429 and calling of their physicians. J Pakistan Med Assoc [Internet]. 2012;62:668–671.  
430 Available from: <https://jpma.org.pk/article-details/3549>.

- 431 [22] Dekeyser FG, Wruble IAW, Margalith II. Patients voice issues of dress and address.  
432 Holist Nurs Pract [Internet]. 2003;17:290–294. Available from:  
433 [https://journals.lww.com/hnpjjournal/Abstract/2003/11000/Patients\\_Voice\\_Issues\\_of\\_Dress\\_and\\_Address.3.aspx](https://journals.lww.com/hnpjjournal/Abstract/2003/11000/Patients_Voice_Issues_of_Dress_and_Address.3.aspx).  
434
- 435 [23] Abuya T, Warren CE, Miller N, et al. Exploring the prevalence of disrespect and abuse  
436 during childbirth in Kenya. PLoS One [Internet]. 2015;10:1–13. Available from:  
437 <http://dx.doi.org/10.1371/journal.pone.0123606>.
- 438 [24] Freedman LP, Kujawski SA, Mbuyita S, et al. Eye of the beholder? Observation versus  
439 self-report in the measurement of disrespect and abuse during facility-based childbirth.  
440 Reprod Health Matters [Internet]. 2018;26:107–122. Available from:  
441 <https://www.tandfonline.com/doi/full/10.1080/09688080.2018.1502024>.
- 442 [25] Bradley S, Chipeta E, Kamwendo F, et al. Too few staff , too many patients: a  
443 qualitative study of the impact on obstetric care providers and on quality of care in  
444 Malawi. BMC Pregnancy Childbirth [Internet]. 2015;15. Available from:  
445 <https://www.ncbi.nlm.nih.gov/pubmed/25880644>.
- 446 [26] Caffrey M, Chilvers R, Martineau T. Human resources for health Nepal country profile  
447 [Internet]. 2013. Available from:  
448 [http://www.nhssp.org.np/NHSSP\\_Archives/human\\_resources/HRH\\_Nepal\\_profile\\_august\\_2013.pdf](http://www.nhssp.org.np/NHSSP_Archives/human_resources/HRH_Nepal_profile_august_2013.pdf).  
449
- 450 [27] Lappeman M, Swartz L. Rethinking obstetric violence and the “neglect of neglect”: the  
451 silence of a labour ward milieu in a South African district hospital. BMC Int Health Hum  
452 Rights [Internet]. 2019;19:30. Available from:

- 453 <https://bmcinthealthhumrights.biomedcentral.com/articles/10.1186/s12914-019-0218-2>.
- 454 [28] D’Ambruoso L, Abbey M, Hussein J. Please understand when I cry out in pain: Women’s  
455 accounts of maternity services during labour and delivery in Ghana. *BMC Public Health*  
456 [Internet]. 2005;5:1–11. Available from:  
457 <https://link.springer.com/content/pdf/10.1186/1471-2458-5-140.pdf>.
- 458 [29] Wassihun B, Zeleke S. Compassionate and respectful maternity care during facility based  
459 child birth and women’s intent to use maternity service in Bahir Dar, Ethiopia. *BMC*  
460 *Pregnancy Childbirth* [Internet]. 2018;18:1–9. Available from:  
461 <https://bmcpregnancychildbirth.biomedcentral.com/articles/10.1186/s12884-018-1909-8#:~:text=Respondents who were facing complication during labor and,did not face complications %5BAOR%3D%202.38 %2895%25CI%3B 1.28%2C 4.45%29%5D>.
- 464 [30] Sando D, Ratcliffe H, Mcdonald K, et al. The prevalence of disrespect and abuse during  
465 facility-based childbirth in urban Tanzania. *BMC Pregnancy Childbirth* [Internet].  
466 2016;16. Available from: <http://dx.doi.org/10.1186/s12884-016-1019-4>.
- 467 [31] Orpin J, Puthussery S, Davidson R, et al. Women’s experiences of disrespect and abuse  
468 in maternity care facilities in Benue State, Nigeria. *BMC Pregnancy Childbirth* [Internet].  
469 2018 [cited 2019 Sep 27];18:1–9. Available from:  
470 <https://bmcpregnancychildbirth.biomedcentral.com/articles/10.1186/s12884-018-1847-5>.
- 471 [32] Hodges S. Abuse in hospital-based birth settings? *J Perinat Educ* [Internet]. 2009;18:8–11.  
472 Available from: <https://www.ncbi.nlm.nih.gov/pmc/articles/PMC2776520/>.
- 473 [33] Pathak P, Ghimire B. Perception of women regarding respectful maternity care during  
474 facility-based childbirth. *Obstet Gynecol Int*. 2020;2020.

- 475 [34] Yakubu J, Health C, Initiative A, et al. It ' s for the greater good □: Perspectives on  
476 maltreatment during labor and delivery in Rural Ghana. *J Obstet Gynecol* [Internet].  
477 2014;4:383–390. Available from:  
478 <https://www.scirp.org/journal/paperinformation.aspx?paperid=46320>.
- 479 [35] WHO. Nursing and midwifery personnel (per 10000 population). 2018.
- 480 [36] United Nations. A human rights-based approach to mistreatment and violence against  
481 women in reproductive health services with a focus on childbirth and obstetric violence  
482 [Internet]. Geneva; 2019. Available from:  
483 <https://digitallibrary.un.org/record/3823698?ln=en>.
- 484 [37] Thapa K, Clark RB. Helping babies breathe ( HBB ) program for reduction of neonatal  
485 mortality □: A hospital based cost effective intervention in Nepal. *Med J Shree Birendra*  
486 *Hosp* [Internet]. 2020; Available from:  
487 <https://www.nepjol.info/index.php/MJSBH/article/view/25961>.
- 488 [38] Ijadunola MY, Olotu EA, Oyedun OO, et al. Lifting the veil on disrespect and abuse in  
489 facility-based child birth care □: findings from South West Nigeria. *BMC Pregnancy*  
490 *Childbirth* [Internet]. 2019;19:1–8. Available from:  
491 <https://bmcpregnancychildbirth.biomedcentral.com/articles/10.1186/s12884-019-2188-8>.
- 492 [39] Silwal K, Poudyal JK, Shah R, et al. Factors influencing birth preparedness in Rapti  
493 Municipality of Chitwan, Nepal. *Int J Pediatr* [Internet]. 2020;2020. Available from:  
494 <https://www.hindawi.com/journals/ijpedi/2020/7402163/>.
- 495 [40] Ndwiga C, Warren CE, Ritter J, et al. Exploring provider perspectives on respectful  
496 maternity care in Kenya □: “ Work with what you have .” *Reprod Health* [Internet].

497 2017;14:1–13. Available from: [https://reproductive-health-](https://reproductive-health-journal.biomedcentral.com/articles/10.1186/s12978-017-0364-8)  
 498 [journal.biomedcentral.com/articles/10.1186/s12978-017-0364-8](https://reproductive-health-journal.biomedcentral.com/articles/10.1186/s12978-017-0364-8).

499

500 List of Tables

501 **Table 1.** Distribution of variables in the study

|                                                                        |                                                                                                                                                                                             |
|------------------------------------------------------------------------|---------------------------------------------------------------------------------------------------------------------------------------------------------------------------------------------|
| <b>Part I-</b> Socio-demographic characteristics and obstetric history | <b>Demographic Information:</b> Age of Mother, Ethnicity, Religion, Type of Family, Educational Status, Educational Level, Occupation, Spouse’s Educational Status, and Spouse’s Occupation |
|                                                                        | <b>Obstetric History:</b> Gravida, Para, Week of Gestation, Type of Delivery, and Complication During Labor                                                                                 |
| <b>Part II-</b> Perceived Disrespect & Abuse <sup>12</sup>             | <b>Friendly Care, Abuse-free Care, Timely Care, and Discrimination-free Care</b>                                                                                                            |

502

503 **Table 2.** Distribution of participants according to socio-demographic information (n= 445)

| <b>Characteristics</b>          | <b>Frequency (n)</b> | <b>Percent (%)</b> |
|---------------------------------|----------------------|--------------------|
| <b>Age (Years)</b>              |                      |                    |
| <b>&lt;20</b>                   | 88                   | 19.8               |
| <b>20-30</b>                    | 331                  | 74.4               |
| <b>30-40</b>                    | 26                   | 5.8                |
| <b>Ethnicity</b>                |                      |                    |
| <b>Brahmin/Chhetri</b>          | 136                  | 30.6               |
| <b>Janjati</b>                  | 205                  | 46.1               |
| <b>Madhesi/Dalit and others</b> | 104                  | 23.4               |
| <b>Religion</b>                 |                      |                    |
| <b>Hindu</b>                    | 406                  | 91.2               |
| <b>Others</b>                   | 39                   | 8.8                |



|                                    |     |      |
|------------------------------------|-----|------|
| <b>Educational Status</b>          |     |      |
| <b>Educated</b>                    | 386 | 86.7 |
| <b>Uneducated</b>                  | 59  | 13.3 |
| <b>Occupation</b>                  |     |      |
| <b>Unemployed</b>                  | 226 | 50.8 |
| <b>Employed</b>                    | 219 | 49.2 |
| <b>Family type</b>                 |     |      |
| <b>Nuclear</b>                     | 208 | 46.7 |
| <b>Joint&amp; Extended</b>         | 237 | 53.3 |
| <b>Monthly income</b>              |     |      |
| <b>&lt;=20000</b>                  | 263 | 59.1 |
| <b>&gt;20000</b>                   | 182 | 40.9 |
| <b>Spouse's educational status</b> |     |      |
| <b>Educated</b>                    | 408 | 91.7 |
| <b>Uneducated</b>                  | 37  | 8.3  |
| <b>Spouse's Occupation</b>         |     |      |
| <b>Foreign employment</b>          | 25  | 5.6  |
| <b>Non-formal employment</b>       | 318 | 71.5 |
| <b>Formal employment</b>           | 102 | 22.9 |

504

505

506 **Table 3.** Distribution of participants according to obstetric history (n=445)

| <b>Characteristics</b> | <b>Frequency (n)</b> | <b>Percent (%)</b> |
|------------------------|----------------------|--------------------|
| <b>Gravida</b>         |                      |                    |
| <b>&lt;=2</b>          | 337                  | 75.7               |
| <b>&gt;2</b>           | 108                  | 24.3               |
| <b>Para</b>            |                      |                    |
| <b>Primi para</b>      | 157                  | 35.3               |
| <b>Multipara</b>       | 288                  | 64.7               |

|                                       |     |      |
|---------------------------------------|-----|------|
| <b>Week of gestation</b>              |     |      |
| <b>Preterm</b>                        | 19  | 4.3  |
| <b>Term</b>                           | 426 | 95.7 |
| <b>Type of delivery</b>               |     |      |
| <b>Spontaneous vaginal delivery</b>   | 229 | 51.5 |
| <b>Augmented</b>                      | 63  | 14.2 |
| <b>Lower section cesarean section</b> | 153 | 34.4 |
| <b>Complications during labor</b>     |     |      |
| <b>Yes</b>                            | 148 | 33.3 |
| <b>No</b>                             | 148 | 66.7 |

507

508

509 **Table 4** Participant reports of RMC (n=445)

| <b>Components of RMC</b>                           | <b>SD<br/>f (%)</b> | <b>D<br/>f (%)</b> | <b>N<br/>f (%)</b> | <b>A<br/>f (%)</b> | <b>SA<br/>f (%)</b> | <b>Mean<br/>(SE)</b> | <b>CM<br/>(SE)</b> |
|----------------------------------------------------|---------------------|--------------------|--------------------|--------------------|---------------------|----------------------|--------------------|
| <b>Friendly care: The health worker/s</b>          |                     |                    |                    |                    |                     |                      |                    |
| <b>Cared with a kind approach</b>                  | 3<br>(0.7)          | 1<br>(0.2)         | 1<br>(0.2)         | 141<br>(31.7)      | 299<br>(67.2)       | 4.64<br>(.027)       | 4.42<br>(.028)     |
| <b>Treated in a friendly manner</b>                | 10<br>(2.2)         | 2<br>(0.4)         | 27<br>(6.1)        | 185<br>(41.6)      | 221<br>(49.7)       | 4.36<br>(.038)       |                    |
| <b>Talked positively about pain and relief</b>     | 5<br>(1.1)          | 4<br>(0.9)         | 14<br>(3.1)        | 200<br>(44.9)      | 222<br>(49.9)       | 4.42<br>(.033)       |                    |
| <b>Showed his/her concern and empathy</b>          | -                   | 1<br>(0.2)         | 38<br>(8.5)        | 187<br>(42)        | 219<br>(49.2)       | 4.40<br>(.031)       |                    |
| <b>Treated with respect as an individual</b>       | 1<br>(0.2)          | 6<br>(1.3)         | 66<br>(14.8)       | 181<br>(40.7)      | 191<br>(42.9)       | 4.25<br>(.036)       |                    |
| <b>Spoke in a language that I could understand</b> | 18<br>(4)           | 29<br>(6.5)        | 24<br>(5.4)        | 174<br>(39.1)      | 200<br>(44.9)       | 4.14<br>(.05)        |                    |

|                                                                                         |               |               |               |               |               |                |                |
|-----------------------------------------------------------------------------------------|---------------|---------------|---------------|---------------|---------------|----------------|----------------|
| <b>Called me by my name</b>                                                             | 113<br>(25.4) | 97<br>(21.8)  | 46<br>(10.3)  | 130<br>(29.2) | 59<br>(13.3)  | 2.83<br>(.068) |                |
| <b>Abuse free care:</b>                                                                 |               |               |               |               |               |                |                |
| <b>The health worker/s</b>                                                              |               |               |               |               |               |                |                |
| <b>Responded to my needs whether or not I asked</b>                                     | 51<br>(11.5)  | 94<br>(21.1)  | 89<br>(20.0)  | 90<br>(20.2)  | 121<br>(27.2) | 3.31<br>(.065) | 4.29<br>(.044) |
| <b>Slapped me during delivery for different reasons (R)</b>                             | 267<br>(60.0) | 121<br>(27.2) | 32<br>(7.2)   | 19<br>(4.3)   | 6<br>(1.3)    | 4.40<br>(0.43) |                |
| <b>Shouted at me because I hadn't done what I was told to do (R)</b>                    | 249<br>(56.0) | 125<br>(28.1) | 50<br>(11.2)  | 17<br>(3.8)   | 4<br>(0.9)    | 4.34<br>(.042) |                |
| <b>Timely Care</b>                                                                      |               |               |               |               |               |                |                |
| <b>Kept waiting for a long time before receiving service (r)</b>                        | 98<br>(22.0)  | 117<br>(26.3) | 106<br>(23.8) | 78<br>(17.5)  | 46<br>(10.3)  | 3.32<br>(.061) | 3.10<br>(.057) |
| <b>Allowed to practice cultural rituals in the facility</b>                             | 169<br>(38.0) | 107<br>(24.0) | 87<br>(19.6)  | 19<br>(4.3)   | 63<br>(14.2)  | 2.33<br>(.066) |                |
| <b>Service provision was delayed due to the health facility's internal problems (r)</b> | 172<br>(38.7) | 102<br>(22.9) | 88<br>(19.8)  | 51<br>(11.5)  | 32<br>(7.2)   | 3.74<br>(.060) |                |
| <b>Discrimination- free care: Some of the health workers</b>                            |               |               |               |               |               |                |                |
| <b>Did not treat me well because of my personal attributes (R)</b>                      | 330<br>(74.2) | 89<br>(20.0)  | 11<br>(2.5)   | 9<br>(2.0)    | 6<br>(1.3)    | 4.64<br>(.036) | 4.67<br>(.032) |
| <b>Insulted me and my companions due to my personal attributes (R)</b>                  | 316<br>(71.0) | 112<br>(25.2) | 4<br>(0.9)    | 5<br>(1.1)    | 8<br>(1.8)    | 4.62<br>(.035) |                |

510 SA- Strongly agree, A- Agree, N- Neutral/ Indifferent, D- Disagree, SD- Strongly disagree

511 SE- Standard error, CM- Cumulative mean

512 **Table 5.** Distribution of Friendly RMC by different socio-demographic and obstetric  
513 characteristics (n=445)

| Characteristics | Friendly care |          |               | $\chi^2$ | p-value |
|-----------------|---------------|----------|---------------|----------|---------|
|                 | Moderate RMC  | High RMC | Very high RMC |          |         |
|                 |               |          |               |          |         |

|                                   | <b>f (%)</b> | <b>f (%)</b> | <b>f (%)</b> |                    |             |
|-----------------------------------|--------------|--------------|--------------|--------------------|-------------|
| <b>Age</b>                        |              |              |              |                    |             |
| <b>&lt;20</b>                     | 1 (1.1)      | 41 (46.6)    | 46 (52.3)    | 8.958 <sub>a</sub> | .062        |
| <b>20-30</b>                      | 24 (7.3)     | 149(45.0)    | 158 (47.7)   |                    |             |
| <b>30-40</b>                      | 1 (3.8)      | 16 (61.5)    | 9 (34.6)     |                    |             |
| <b>Ethnicity</b>                  |              |              |              |                    |             |
| <b>Brahmin/Chhetri</b>            | 10 (7.4)     | 58 (42.6)    | 68 (50.0)    | 6.754              | .149        |
| <b>Janjati</b>                    | 8 (3.9)      | 92 (44.9)    | 105 (51.2)   |                    |             |
| <b>Madhesi/Dalit &amp; others</b> | 8 (7.7)      | 56 (53.8)    | 40 (38.5)    |                    |             |
| <b>Educational Status</b>         |              |              |              |                    |             |
| <b>Educated</b>                   | 25 (6.5)     | 177(45.9)    | 184 (47.7)   | 2.817 <sub>a</sub> | .244        |
| <b>Uneducated</b>                 | 1 (1.7)      | 29 (49.2)    | 29 (49.2)    |                    |             |
| <b>Occupation</b>                 |              |              |              |                    |             |
| <b>Unemployed</b>                 | 9 (4.0)      | 115(50.9)    | 102 (45.1)   | 5.529              | .063        |
| <b>Employed</b>                   | 17 (7.8)     | 91 (416)     | 111 (50.7)   |                    |             |
| <b>Monthly income</b>             |              |              |              |                    |             |
| <b>&lt;=20000</b>                 | 5 (1.9)      | 126(47.9)    | 132 (50.2)   | 18.188             | <b>.000</b> |
| <b>&gt;20000</b>                  | 21 (11.5)    | 80 (44.0)    | 81 (44.5)    |                    |             |
| <b>Spouse's Occupation</b>        |              |              |              |                    |             |
| <b>Foreign</b>                    | 0(.0)        | 13(52.0)     | 12(48.0)     | 3.605 <sub>a</sub> | .462        |
| <b>Non-formal</b>                 | 21(6.6)      | 146(45.9)    | 151(47.5)    |                    |             |
| <b>Formal employment</b>          | 5(4.9)       | 47(46.1)     | 50(49.0)     |                    |             |
| <b>Gravida</b>                    |              |              |              |                    |             |
| <b>&lt;=2</b>                     | 7 (2.1)      | 146(43.3)    | 184 (54.6)   | 49.498             | <b>.000</b> |
| <b>&gt;2</b>                      | 19 (17.6)    | 60 (55.6)    | 29 (26.9)    |                    |             |
| <b>Para</b>                       |              |              |              |                    |             |
| <b>Primi para</b>                 | 2 (1.3)      | 83 (52.9)    | 72 (45.9)    | 11.135             | <b>.004</b> |
| <b>Multi para</b>                 | 24 (8.3)     | 123(42.7)    | 141 (49.0)   |                    |             |

|                          |          |           |            |                    |             |
|--------------------------|----------|-----------|------------|--------------------|-------------|
| <b>Week of gestation</b> |          |           |            |                    |             |
| <b>Preterm</b>           | 0        | 14 (73.7) | 5 (26.3)   | 7.302 <sub>a</sub> | <b>.026</b> |
| <b>Term</b>              | 26 (6.1) | 192(45.1) | 208 (48.8) |                    |             |
| <b>Type of delivery</b>  |          |           |            |                    |             |
| <b>SVD</b>               | 10 (4.4) | 100(43.7) | 119 (52.0) | 6.112 <sub>a</sub> | .191        |
| <b>Augmented</b>         | 6 (9.5)  | 34 (54.0) | 23 (36.5)  |                    |             |
| <b>LSCS</b>              | 10 (6.5) | 72 (47.1) | 71 (46.4)  |                    |             |
| <b>Complications</b>     |          |           |            |                    |             |
| <b>Yes</b>               | 7 (4.7)  | 69 (46.6) | 72 (48.6)  | 0.504              | .777        |
| <b>No</b>                | 19 (6.4) | 137(46.1) | 141 (47.5) |                    |             |

514 <sub>a</sub> - likelihood ratio

515

516 **Table 6.** Distribution of Abuse-free RMC by different socio-demographic and obstetric  
517 characteristics (n=445)

| <b>Characteristics</b>            | <b>Abuse Free Care</b>        |                          |                               |                           |                                | $\chi^2$            | <b>p-value</b> |
|-----------------------------------|-------------------------------|--------------------------|-------------------------------|---------------------------|--------------------------------|---------------------|----------------|
|                                   | <b>Very Low RMC<br/>f (%)</b> | <b>Low RMC<br/>f (%)</b> | <b>Moderate RMC<br/>f (%)</b> | <b>High RMC<br/>f (%)</b> | <b>Very High RMC<br/>f (%)</b> |                     |                |
| <b>Age</b>                        |                               |                          |                               |                           |                                |                     |                |
| <b>&lt;20</b>                     | -                             | 2(2.3)                   | 13(14.8)                      | 39(44.3)                  | 34(38.6)                       | 11.606 <sub>a</sub> | .212           |
| <b>20-30</b>                      | 4(1.2)                        | 12(3.6)                  | 71(21.5)                      | 94(28.4)                  | 150(45.3)                      |                     |                |
| <b>30-40</b>                      | -                             | 1(3.8)                   | 5 (19.2)                      | 11(42.3)                  | 9 (34.6)                       |                     |                |
| <b>Ethnicity</b>                  |                               |                          |                               |                           |                                |                     |                |
| <b>Brahmin/Chhetri</b>            | 0(.0)                         | 2(1.5)                   | 32(23.5)                      | 42(30.9)                  | 60(44.1)                       | 11.214              | .186           |
| <b>Janjati</b>                    | 1(.5)                         | 8(3.9)                   | 36(17.6)                      | 66(32.2)                  | 94(45.9)                       |                     | .190           |
| <b>Madhesi/Dalit &amp; others</b> | 3(2.9)                        | 5(4.8)                   | 21(20.2)                      | 36(34.6)                  | 39(37.5)                       |                     |                |
| <b>Educational Status</b>         |                               |                          |                               |                           |                                |                     |                |

|                            |        |         |          |           |           |                     |             |
|----------------------------|--------|---------|----------|-----------|-----------|---------------------|-------------|
| <b>Educated</b>            | 3(.8)  | 10(2.6) | 74(19.2) | 129(33.4) | 170(44.0) | 11.214 <sub>a</sub> | .190        |
| <b>Uneducated</b>          | 1(1.7) | 5(8.5)  | 15(25.4) | 15(25.4)  | 23(39.0)  |                     |             |
| <b>Occupation</b>          |        |         |          |           |           |                     |             |
| <b>Unemployed</b>          | 3(1.3) | 6 (2.7) | 40(17.7) | 81(35.8)  | 96(42.5)  | 4.713 <sub>a</sub>  | .318        |
| <b>Employed</b>            | 1 (.5) | 9 (4.1) | 49(22.4) | 63(28.8)  | 97(44.3)  |                     |             |
| <b>Monthly income</b>      |        |         |          |           |           |                     |             |
| <b>&lt;=20000</b>          | 1(.4)  | 11(4.2) | 50(19.0) | 79(30.0)  | 122(46.4) | 5.981 <sub>a</sub>  | .201        |
| <b>&gt;20000</b>           | 3(1.6) | 4(2.2)  | 39(21.4) | 65(35.7)  | 71(39.0)  |                     |             |
| <b>Spouse's Occupation</b> |        |         |          |           |           |                     |             |
| <b>Foreign</b>             | 0(.0)  | 0(.0)   | 4(16.0)  | 3(12.0)   | 18(72.0)  | 24.143 <sub>a</sub> | <b>.002</b> |
| <b>Non-formal</b>          | 3(.9)  | 15(4.7) | 61(19.2) | 99(31.1)  | 140(44.0) |                     |             |
| <b>Formal employment</b>   | 1(1.0) | 0(.0)   | 24(23.5) | 42(41.2)  | 35(34.3)  |                     |             |
| <b>Gravida</b>             |        |         |          |           |           |                     |             |
| <b>&lt;=2</b>              | 2(.6%) | 14(4.2) | 69(20.5) | 103(30.6) | 149(44.2) | 6.223 <sub>a</sub>  | .183        |
| <b>&gt;2</b>               | 2(1.9) | 1(.9)   | 20(18.5) | 41(38.0)  | 44(40.7)  |                     |             |
| <b>Para</b>                |        |         |          |           |           |                     |             |
| <b>Primi para</b>          | 1(.6)  | 9(5.7)  | 40(25.5) | 54(34.4)  | 53(33.8)  | 13.184 <sub>a</sub> | <b>.010</b> |
| <b>Multipara</b>           | 3(1.0) | 6(2.1)  | 49(17.0) | 90(31.2)  | 140(48.6) |                     |             |
| <b>Week of gestation</b>   |        |         |          |           |           |                     |             |
| <b>Preterm</b>             | 0(.0)  | 0(.0)   | 7(36.8)  | 7(36.8)   | 5(26.3)   | 5.592 <sub>a</sub>  | .232        |
| <b>Term</b>                | 4(.9)  | 15(3.5) | 82(19.2) | 137(32.2) | 188(44.1) |                     |             |
| <b>Type of delivery</b>    |        |         |          |           |           |                     |             |
| <b>SVD</b>                 | 3(1.3) | 4(1.7)  | 50(21.8) | 69(30.1)  | 103(45.0) | 29.030 <sub>a</sub> | <b>.000</b> |
| <b>Augmented</b>           | 1(1.6) | 9(14.3) | 12(19.0) | 25(39.7)  | 16(25.4)  |                     |             |
| <b>LSCS</b>                | 0(.0)  | 2(1.3)  | 27(17.6) | 50(32.7)  | 74(48.4)  |                     |             |
| <b>Complications</b>       |        |         |          |           |           |                     |             |
| <b>Yes</b>                 | 1(.7)  | 1(.7)   | 32(21.6) | 45(30.4)  | 69(46.6)  | 7.391 <sub>a</sub>  | .117        |

|    |        |         |          |          |           |  |  |
|----|--------|---------|----------|----------|-----------|--|--|
| No | 3(1.0) | 14(4.7) | 57(19.2) | 99(33.3) | 124(41.8) |  |  |
|----|--------|---------|----------|----------|-----------|--|--|

518 a\_ likelihood ratio

519 **Table 7.** Distribution of Timely RMC by different socio-demographic and obstetric  
 520 characteristics (n=445)

| Characteristics            | Timely Care  |           |              |          |               | $\chi^2$ | p-value |
|----------------------------|--------------|-----------|--------------|----------|---------------|----------|---------|
|                            | Very Low RMC | Low RMC   | Moderate RMC | High RMC | Very high RMC |          |         |
| <b>Age</b>                 |              |           |              |          |               |          |         |
| <20                        | 0(.0)        | 8(9.1)    | 37(42.0)     | 25(28.4) | 18(20.5)      | 55.822a  | .000    |
| 20-30                      | 38(11.5)     | 33(10.0)  | 179(54.1)    | 73(22.1) | 8(2.4)        | 54.618   | .000    |
| 30-40                      | 3(11.5)      | 1(3.8 0)  | 13(50.0)     | 9(34.6)  | 0(.0)         |          |         |
| <b>Ethnicity</b>           |              |           |              |          |               |          |         |
| Brahmin/Chhetri            | 19(14.0)     | 13(9.6)   | 75(55.1)     | 29(21.3) | 0(.0)         | 24.939a  | .002    |
| Janjati                    | 12(5.9)      | 17(8.3)   | 101(49.3)    | 53(25.9) | 22(10.7)      |          |         |
| Madhesi/Dalit & others     | 10(9.6)      | 12(11.5)  | 53(51.0)     | 25(24.0) | 4(3.8)        |          |         |
| <b>Educational Status</b>  |              |           |              |          |               |          |         |
| Educated                   | 38(9.8)      | 39(10.1)  | 198(51.3)    | 90(23.3) | 21(5.4)       | 4.089a   | .394    |
| Uneducated                 | 3(5.1)       | 3(5.1)    | 31(52.5)     | 17(28.8) | 5(8.5)        | 4.420    | .352    |
| <b>Occupation</b>          |              |           |              |          |               |          |         |
| Unemployed                 | 10(4.4)      | 29(12.8)  | 113(50.0)    | 61(27.0) | 13(5.8)       | 18.888a  | .001    |
| Employed                   | 31(14.2)     | 13(5.9)   | 116(53.0)    | 46(21.0) | 13(5.9)       |          |         |
| <b>Monthly income</b>      |              |           |              |          |               |          |         |
| ≤20000                     | 18(6.8)      | 23(8.7)   | 129(49.0)    | 68(25.9) | 25(9.5)       | 20.616a  | .000    |
| >20000                     | 23(12.6)     | 199(10.4) | 100(54.9)    | 39(21.4) | 1(.5)         |          |         |
| <b>Spouse's Occupation</b> |              |           |              |          |               |          |         |

|                            |          |          |           |           |          |         |             |
|----------------------------|----------|----------|-----------|-----------|----------|---------|-------------|
| <b>Foreign</b>             | 6(24.0)  | 2(8.0)   | 13(2.0)   | 4(16.0)   | 0(.0)    | 13.692a | .090        |
| <b>Nonformal</b>           | 25(7.9)  | 31(9.7)  | 159(50.0) | 79(24.8)  | 24(7.5)  | 14.218  | .076        |
| <b>Formal employment</b>   | 10(9.8)  | 9(8.8)   | 57(55.9)  | 24(23.5)  | 2(2.0)   |         |             |
| <b>Gravida</b>             |          |          |           |           |          |         |             |
| <b>&lt;=2</b>              | 17(5.0)  | 32(9.5)  | 185(54.9) | 85(25.2)  | 18(5.3)  | 30.782a | <b>.000</b> |
| <b>&gt;2</b>               | 24(22.2) | 10(9.3)  | 44(40.7)  | 22(20.4)  | 8(7.4)   |         |             |
| <b>Para</b>                |          |          |           |           |          |         |             |
| <b>Primi para</b>          | 8(5.1)   | 18(11.5) | 87(55.4)  | 39(24.8)  | 5(3.2)   | 9.255a  | .055        |
| <b>Multi para</b>          | 33(11.5) | 24(8.3)  | 142(49.3) | 68(23.6)  | 21(7.3)  |         |             |
| <b>Week of gestation</b>   |          |          |           |           |          |         |             |
| <b>Preterm</b>             | 2(10.5)  | 0(.0)    | 10(52.6)  | 5(26.3)   | 2(10.5)  | 2.703a  | .609        |
| <b>Term</b>                | 39(9.2)  | 42(9.9)  | 219(51.4) | 102(23.9) | 24(5.6)  | 4.355   | .360        |
| <b>Type of delivery</b>    |          |          |           |           |          |         |             |
| <b>SVD</b>                 | 20(8.7)  | 14(6.1)  | 129(56.3) | 56(24.5)  | 10(4.4)  | 22.359a | .004        |
| <b>Augmented</b>           | 10(15.9) | 7(11.1)  | 32(50.8)  | 14(22.2)  | 0(.0)    | 24.612  | <b>.002</b> |
| <b>LSCS</b>                | 11(7.2)  | 21(13.7) | 68(44.4)  | 37(24.2)  | 16(10.5) |         |             |
| <b>Complication</b>        |          |          |           |           |          |         |             |
| <b>Yes</b>                 | 10(6.8)  | 22(14.9) | 68(45.9)  | 33(22.3)  | 15(10.1) | 16.957a | <b>.002</b> |
| <b>No</b>                  | 31(10.4) | 20(6.7)  | 161(54.2) | 74(24.9)  | 11(3.7)  |         |             |
| <b>No. of living child</b> |          |          |           |           |          |         |             |
| <b>≤2</b>                  | 22(5.8)  | 37(9.8)  | 204(54.0) | 92(24.3)  | 23(6.1)  | 35.113a | .000        |
| <b>&gt;2</b>               | 19(28.4) | 5(7.5)   | 25(37.3)  | 15(22.4)  | 3(4.5)   | 26.558  | .000        |

521 a\_ likelihood ratio

522 **Table 8.** Associated factors for Timely RMC during delivery (n=445)



| Predictors                   | Neutral RMC     |         | High RMC        |         |
|------------------------------|-----------------|---------|-----------------|---------|
|                              | OR( CI)         | P-Value | OR(CI)          | P-Value |
| Type of Delivery             |                 |         |                 |         |
| SVD                          | 2.07(1.15-3.72) | 0.01    | 1.38(0.74-2.59) | 0.30    |
| Augmented                    | 0.99(0.47-2.10) | 0.99    | 0.56(0.23-1.36) | 0.18    |
| LSCS                         | 0 <sup>b</sup>  | -       | 0 <sup>b</sup>  | -       |
| Gravida                      |                 |         |                 |         |
| Primi                        | 2.28(0.92-6.29) | 0.07    | 2.20(0.82-5.90) | 0.12    |
| Multi                        | 0 <sup>b</sup>  |         | 0 <sup>b</sup>  | -       |
| Monthly income (NPR)         |                 |         |                 |         |
| ≤20000                       | 1.33(0.78-2.24) | 0.289   | 2.36(1.3-4.23)  | 0.004   |
| >20000                       | 0 <sup>b</sup>  | -       | 0 <sup>b</sup>  |         |
| Complication during delivery |                 |         |                 |         |
| Yes                          | 0.81(0.43-1.53) | 0.52    | 0.63(0.31-1.27) | 0.63    |
| No                           | 0 <sup>b</sup>  | -       | 0 <sup>b</sup>  |         |
| Living Children              |                 |         |                 |         |
| ≤2                           | 1.86(0.74-2.59) | 0.048   | 1.52(0.52-4.39) | 0.43    |
| ≥2                           | 0 <sup>b</sup>  | -       | 0 <sup>b</sup>  | -       |

523 Model fitting information= Chi-square= 3.68,df=12 p-value=0.000, Pseudo R<sup>2</sup> Nagelkerke=0.096

524 a. The reference category is 1.00 Low RMC, b This parameter set zero because it is redundant,

525
